# Supplementary material
Source: PubMed Central journal article supplement (PMC5886357)
Supplement: NIHMS76817-supplement-Supplementary_results.pdf [file NIHMS76817-supplement-Supplementary_results.pdf]

## Supplementary results

| Region                                | Brodmann area | Cluster extent (voxels) | X   | Y   | Z   |
|---------------------------------------|---------------|-------------------------|-----|-----|-----|
| Precuneus, posterior cingulate cortex | 5, 7, 23      | 10412                   | 2   | -58 | 38  |
| Angular gyrus                         | 39            | 3560                    | 46  | -58 | 22  |
| Angular gyrus                         | 39            | 2744                    | -42 | -70 | 26  |
| Middle temporal gyrus                 | 21            | 2011                    | 62  | -22 | -10 |
| Middle temporal pole                  | 38            | 869                     | -48 | 18  | -30 |
| Parahippocampal gyrus                 | 36            | 522                     | 22  | -16 | -26 |
| Thalamus                              | -             | 421                     | 22  | -12 | 10  |
| Middle frontal gyrus                  | 8             | 417                     | -22 | 28  | 48  |
| Superior medial frontal gyrus         | 10            | 344                     | 14  | 56  | 2   |
| Pallidum                              | 25            | 340                     | -12 | 6   | -6  |
| Middle frontal gyrus                  | 8             | 236                     | 26  | 16  | 50  |
| Superior orbital frontal gyrus        | 11            | 154                     | -10 | 54  | -24 |
| Hippocampus                           | 34            | 80                      | 16  | -2  | -10 |
| Superior frontal gyrus                | 46            | 36                      | 26  | 44  | 12  |
| Cerebellum                            | -             | 36                      | 38  | -42 | -44 |
| Brainstem                             | -             | 31                      | -8  | -22 | -32 |
| Brainstem                             | -             | 12                      | -4  | -26 | -14 |
| Middle temporal gyrus                 | 20            | 10                      | -52 | -14 | -12 |
| Gyrus rectus                          | 11            | 5                       | -2  | 26  | -26 |
| Thalamus                              | -             | 4                       | -8  | -16 | 6   |
| Cerebellum                            | -             | 4                       | -12 | -78 | -36 |
